# Supplementary material for: Effectiveness of Multiple-Strategy Community Intervention in Reducing Geographical, Socioeconomic and Gender Based Inequalities in Maternal and Child Health Outcomes in Haryana, India
Source: PLOS journal article supplement (doi:10.1371/journal.pone.0150537), 2016-03-22
Supplement: S3 (10.1371/journal.pone.0150537.s003) [file journal.pone.0150537.s003]

**S3 Table. Status of maternal and child health indicators pre, during and post NRHM implementation in Haryana as per DLHS rounds 2, 3 and 4.**

| Indicators                                            | Pre NRHM    | During NRHM | Post NRHM   | P value |
|-------------------------------------------------------|-------------|-------------|-------------|---------|
|                                                       | (2002-2004) | (2007-2008) | (2012-2013) |         |
| Maternal Mortality Ratio                              | 1.86        | 1.53        | 1.21        | 0.13    |
| Infant Mortality Rate                                 | 61          | 55          | 41          | 0.09    |
| <b>Antenatal care (%): Pregnant women</b>             |             |             |             |         |
| Registered in the first trimester                     | 13.7        | 55.1        | 82.1        | 0.00    |
| With three or more ANC                                | 43.1        | 51.9        | 74.5        | 0.00    |
| With full ANC check up                                | 11.8        | 13.3        | 21.8        | 0.06    |
| Who got at least one TT injection                     | 83.5        | 86.1        | 93.6        | 0.04    |
| Two TT injections                                     | 77.5        | 79.4        | 58.1        | 0.05    |
| Who had atleast 100 IFA tablets                       | 16.5        | 29.0        | 29.5        | 0.00    |
| <b>Natal care (%)</b>                                 |             |             |             |         |
| Institutional delivery rate                           | 35.7        | 46.9        | 76.9        | 0.00    |
| Safe deliveries (Deliveries assisted by skilled birth | 43.9        | 53.4        | 91.0        | 0.00    |

|                                                                                          |      |      |      |      |
|------------------------------------------------------------------------------------------|------|------|------|------|
| attendants)                                                                              |      |      |      |      |
| <b>Post natal care (%): Mothers who received post natal care within</b>                  |      |      |      |      |
| 48 hours of delivery                                                                     | NA   | 48.8 | 67.2 | 0.01 |
| 2 weeks of delivery                                                                      | 8.9  | 49.5 | 69   | 0.07 |
| <b>Child Health (%):Children aged 12-23 months who received</b>                          |      |      |      |      |
| Full immunization                                                                        | 59.1 | 59.6 | 52.1 | 0.28 |
| No vaccination                                                                           | 11.8 | 1.9  | 5.9  | 0.00 |
| BCG vaccine                                                                              | 83.5 | 86.5 | 84.2 | 0.96 |
| 3 doses of DPT vaccine                                                                   | 72.9 | 67.9 | 71.1 | 0.72 |
| 3 doses of polio vaccine                                                                 | 73.6 | 69.0 | 72.7 | 0.83 |
| Measles vaccine                                                                          | 65.4 | 69.0 | 70.0 | 0.53 |
| <b>Breast feeding practices (%)</b>                                                      |      |      |      |      |
| Exclusively breast fed for<br>atleast 6 months                                           | 33   | 5.7  | 27.4 | 0.00 |
| <b>Women awareness about</b>                                                             |      |      |      |      |
| Diarrhoea Managment                                                                      | 49.8 | 79   | 81.7 | 0.00 |
| Danger signs of Acute<br>respiratory infection                                           | 49.8 | 76.3 | 75.2 | 0.00 |
| <b>Percentage of women whose child suferred from illness in last two weeks of survey</b> |      |      |      |      |
| Diarrhoea                                                                                | 18.1 | 16.0 | 4.0  | 0.00 |

|                                                                               |      |      |      |      |
|-------------------------------------------------------------------------------|------|------|------|------|
| ARI                                                                           | 10.8 | 8.3  | 3.6  | 0.00 |
| <b>Childhood Diseases: Children with (illness reported in last two weeks)</b> |      |      |      |      |
| Diarrhoea who received ORS                                                    | 32.3 | 31.7 | 44.8 | 0.08 |
| Diarrhoea who sought advise/treatment                                         | 78.4 | 82.0 | 68.7 | 0.05 |
| Acute respiratory infection who sought advise/treatment                       | 78   | 88.1 | 85.5 | 0.5  |
